# Supplementary material for: An LC-MS/MS method for the determination of 28 polar environmental contaminants and metabolites in vegetables irrigated with treated municipal wastewater
Source: Royal Society of Chemistry journal article supplement (doi:10.1039/c6ay02984a), 2017-01-01
Supplement: c6ay02984a1.pdf [file c6ay02984a1.pdf]

## Electronic Supplementary Material

An LC-MS/MS method for the determination of 28 environmental contaminants and metabolites in vegetables irrigated with treated municipal wastewater

Christina Riemenschneider<sup>1</sup>, Bettina Seiwert<sup>1</sup>, Myah Goldstein<sup>2</sup>, Marwan Al-Raggad<sup>3</sup>, Elias Salameh<sup>3</sup>, Benny Chefetz<sup>2</sup>, Thorsten Reemtsma<sup>1</sup>

<sup>1</sup> Helmholtz Centre for Environmental Research - UFZ, Department of Analytical Chemistry, Permoserstrasse 15, 04318 Leipzig

<sup>2</sup> The Hebrew University of Jerusalem, Department of Soil and Water Sciences, P.O. Box 12, Rehovot 7610001, Israel

<sup>3</sup> University of Jordan, Water, Energy and Environment Center, Amman 11942, Jordan

\* Corresponding author: Thorsten Reemtsma (thorsten.reemtsma@ufz.de)

## Chemicals

Acesulfame, acridine, benzotriazole, caffeine, carbamazepine, carbamazepine 10,11-epoxide (EP-CBZ), carbamazepine-d10, diclofenac, gabapentin, hydrochlorothiazide, 4-methyl-1H-benzotriazole, 5-methyl-1H-benzotriazole, oxcarbazepine, sulfamethoxazole and trimethoprim were purchased from Sigma-Aldrich (Munich, Germany). 2-hydroxy carbamazepine (2-OH-CBZ), 3-hydroxy carbamazepine (3-OH-CBZ), 10,11-dihydro-10-hydroxy carbamazepine (10-OH-CBZ), *cis*-10,11-dihydroxy-10,11-dihydrocarbamazepine (*cis*-DiOH-CBZ), *rac trans*-10,11-dihydro-10,11-dihydroxycarbamazepine (*trans*-DiOH-CBZ), lamotrigine and acridone were obtained from Toronto Research Chemicals (Toronto, Canada). Ciprofloxacin was ordered from Bioforsk (Saerheim, Norway), gemfibrozil from ICV-Biomedicals (Eschwege, Germany), mefenamic acid from ABCR (Karlsruhe, Germany) and iohexol from Santa Cruz Biotechnology (Heidelberg, Germany). Iomeprol and metalaxyl were purchased from Dr. Ehrendorfer (Augsburg, Germany) and iopamidol and iopromide were obtained from EDQM (Straßburg, France). Bondensil-PSA and anhydrous magnesium sulfate were from Agilent Technologies (Santa Clara, US), acetone from AppliChem (Darmstadt, Germany) and sodium chloride from Merck (Darmstadt, Germany).

Methanol, acetonitrile and acetic acid (Biosolve, Valkenswaard, The Netherlands) were of analytical and UPLC grade. All aqueous solutions were prepared by using ultrapure water from a Milli-Q system (Merck, Darmstadt, Germany).

**Table S1:** Optimized parameters for the QTrap-MS/MS analysis of the target compounds: declustering potential (DP), collision energy (CE) and mean retention time (RT).

| compound                                                                            | ESI polarity | Precursor ion<br>(m/z) | DP (V) | MRM 1 | CE 1 (eV) | MRM 2 | CE 2 (eV) | RT (min) |
|-------------------------------------------------------------------------------------|--------------|------------------------|--------|-------|-----------|-------|-----------|----------|
| Acesulfame                                                                          | -            | 162                    | -50    | 82    | -20       | 78    | -40       | 4.2      |
| 4-/5-Methylbenzotriazole                                                            | +            | 134                    | 71     | 77    | 31        | 78    | 29        | 11.3     |
| Benzotriazole                                                                       | +            | 120                    | 126    | 65    | 29        | 92    | 23        | 8.4      |
| Ciprofloxacin                                                                       | +            | 332                    | 106    | 314   | 29        | 231   | 51        | 7.3      |
| Caffeine                                                                            | +            | 195                    | 80     | 138   | 27        | 110   | 31        | 7.7      |
| Diclofenac                                                                          | -            | 295                    | -40    | 252   | -16       | 250   | -16       | 44.5     |
| Gabapentin                                                                          | +            | 172                    | 36     | 154   | 19        | 137   | 21        | 6.3      |
| Gemfibrozil                                                                         | -            | 249                    | -60    | 121   | -24       | 127   | -16       | 45.4     |
| Hydrochlorothiazide                                                                 | -            | 295                    | -110   | 268   | -28       | 205   | -32       | 5.5      |
| Iohexol                                                                             | +            | 821                    | 136    | 803   | 27        | 603   | 35        | 3.5      |
| Iopropol                                                                            | +            | 777                    | 76     | 686   | 29        | 558   | 33        | 3.9      |
| Iopamidol                                                                           | +            | 777                    | 76     | 558   | 33        | 686   | 29        | 2.4      |
| Iopromide                                                                           | +            | 791                    | 46     | 572   | 33        | 773   | 27        | 6.3      |
| Lamotrigine                                                                         | +            | 256                    | 91     | 211   | 39        | 109   | 63        | 8.2      |
| Mefenamic acid                                                                      | -            | 240                    | -65    | 196   | -24       | 180   | -38       | 45.3     |
| Metalaxyl                                                                           | +            | 280                    | 71     | 220   | 19        | 160   | 33        | 30.1     |
| Sulfamethoxazole                                                                    | +            | 254                    | 56     | 156   | 21        | 92    | 35        | 8.4      |
| Carbamazepine (CBZ)                                                                 | +            | 237                    | 106    | 194   | 25        | 193   | 47        | 22.4     |
| Acridine                                                                            | +            | 180                    | 40     | 152   | 47        | -     | -         | 9.6      |
| Acridone                                                                            | +            | 196                    | 126    | 167   | 49        | -     | -         | 16.1     |
| carbamazepine 10,11-epoxide (EP-CBZ)                                                | +            | 253                    | 31     | 180   | 41        | 236   | 15        | 12.8     |
| 10,11-dihydro-10-hydroxy carbamazepine (10-OH-CBZ)                                  | +            | 255                    | 51     | 194   | 31        | 237   | 15        | 12.8     |
| 2-hydroxy carbamazepine (2-OH-CBZ)                                                  | +            | 253                    | 61     | 210   | 29        | 208   | 35        | 12.9     |
| 3-hydroxy carbamazepine (3-OH-CBZ)                                                  | +            | 253                    | 61     | 210   | 27        | 208   | 29        | 15.7     |
| 10,11-dihydro-10,11- <i>cis</i> -dihydroxycarbamazepine ( <i>cis</i> -DiOH-CBZ)     | +            | 271                    | 86     | 180   | 43        | 210   | 21        | 7.9      |
| Oxcarbazepine                                                                       | +            | 253                    | 71     | 236   | 19        | 208   | 27        | 15.1     |
| 10,11-dihydro-10,11- <i>trans</i> -dihydroxycarbamazepine ( <i>trans</i> -DiOH-CBZ) | +            | 271                    | 26     | 180   | 49        | 253   | 11        | 11.6     |

**Table S2:** Concentration of carbamazepine (CBZ) and its metabolites in treated wastewater (TWW) and the irrigation water of greenhouse experiments (spiked TWW). Analysis was performed by LC-MS/MS.

|                        | concentration in TWW [ $\mu\text{g/L}$ ] # | concentration in spiked TWW [ $\mu\text{g/L}$ ] |
|------------------------|--------------------------------------------|-------------------------------------------------|
|                        |                                            | greenhouse experiment                           |
| CBZ                    | 1.06                                       | 1.99                                            |
| EP-CBZ                 | N.A.*                                      | 0.07                                            |
| 2-OH-CBZ               | N.A.                                       | 0.23                                            |
| 3-OH-CBZ               | N.A.                                       | 0.08                                            |
| 10-OH-CBZ              | N.A.                                       | 0.76                                            |
| <i>trans</i> -DiOH-CBZ | N.A.                                       | 2.44                                            |

# M. Goldstein, M. Shenker and B. Chefetz, *Environ. Sci. Technol.*, 2014, **48**, 5593-5600.

\* Not analyzed.

**Table S3:** Physico-chemical properties and application of target analytes

| Compound                                                                             | Molecular weight (g/mol) | Formula                                                                      | log <i>D</i> (pH 7)* | pKa*      | Application          |
|--------------------------------------------------------------------------------------|--------------------------|------------------------------------------------------------------------------|----------------------|-----------|----------------------|
| Acesulfame                                                                           | 163.15                   | C <sub>4</sub> H <sub>4</sub> KNO <sub>4</sub> S                             | -3.12                | -         | artificial sweetener |
| 4-/5-Methylbenzotriazole                                                             | 133.15                   | C <sub>9</sub> H <sub>9</sub> N <sub>3</sub>                                 | 1.67                 | 1.7; 8.5  | corrosion inhibitor  |
| Benzotriazole                                                                        | 119.12                   | C <sub>6</sub> H <sub>5</sub> N <sub>3</sub>                                 | 1.59                 | 1.2; 8.4  | corrosion inhibitor  |
| Ciprofloxacin                                                                        | 331.34                   | C <sub>17</sub> H <sub>18</sub> FN <sub>3</sub> O <sub>3</sub>               | -2.47                | 6.4; 8.7  | antibacterial agent  |
| Caffeine                                                                             | 194.19                   | C <sub>15</sub> H <sub>12</sub> N <sub>2</sub> O                             | 0.42                 | -         | stimulant            |
| Diclofenac                                                                           | 296.15                   | C <sub>14</sub> H <sub>11</sub> Cl <sub>2</sub> NO <sub>2</sub>              | 1.83                 | 4.2       | antirheumatic agent  |
| Gabapentin                                                                           | 171.24                   | C <sub>9</sub> H <sub>17</sub> NO <sub>2</sub>                               | -1.47                | 4.7; 10.3 | anticonvulsant       |
| Gemfibrozil                                                                          | 250.34                   | C <sub>15</sub> H <sub>22</sub> O <sub>3</sub>                               | 1.86                 | 4.8       | pharmaceutical       |
| Hydrochlorothiazide                                                                  | 297.74                   | C <sub>7</sub> H <sub>8</sub> ClN <sub>3</sub> O <sub>4</sub> S <sub>2</sub> | 0.02                 | 9.0; 9.6  | diuretic             |
| Iohexol                                                                              | 821.14                   | C <sub>19</sub> H <sub>26</sub> I <sub>3</sub> N <sub>3</sub> O <sub>9</sub> | -3.03                | >11.3     | x-ray contrast agent |
| Iomeprol                                                                             | 777.09                   | C <sub>17</sub> H <sub>22</sub> I <sub>3</sub> N <sub>3</sub> O <sub>8</sub> | -2.55                | >11.3     | x-ray contrast agent |
| Iopamidol                                                                            | 777.09                   | C <sub>17</sub> H <sub>22</sub> I <sub>3</sub> N <sub>3</sub> O <sub>8</sub> | -2.35                | >10.9     | x-ray contrast agent |
| Iopromide                                                                            | 791.11                   | C <sub>18</sub> H <sub>24</sub> I <sub>3</sub> N <sub>3</sub> O <sub>8</sub> | -1.98                | >10.6     | x-ray contrast agent |
| Lamotrigine                                                                          | 256.10                   | C <sub>9</sub> H <sub>7</sub> Cl <sub>2</sub> N <sub>5</sub>                 | 2.32                 | 5.4       | anticonvulsant       |
| Mefenamic acid                                                                       | 241.29                   | C <sub>15</sub> H <sub>15</sub> NO <sub>2</sub>                              | 2.14                 | 3.7       | antirheumatic agent  |
| Metalaxyl                                                                            | 279.33                   | C <sub>15</sub> H <sub>21</sub> NO <sub>4</sub>                              | 1.81                 | 1.4       | pesticide            |
| Sulfamethoxazole                                                                     | 253.28                   | C <sub>10</sub> H <sub>11</sub> N <sub>3</sub> O <sub>3</sub> S              | -0.30                | 1.4; 5.8  | antibacterial agent  |
| Carbamazepine (CBZ)                                                                  | 236.27                   | C <sub>15</sub> H <sub>12</sub> N <sub>2</sub> O                             | 2.17                 | -         | anticonvulsant       |
| Acridine                                                                             | 179.22                   | C <sub>13</sub> H <sub>9</sub> N                                             | 3.30                 | 5.6       | CBZ metabolite       |
| Acridone                                                                             | 195.22                   | C <sub>13</sub> H <sub>9</sub> NO                                            | 4.08                 | -         | CBZ metabolite       |
| carbamazepine 10,11-epoxide (EP-CBZ)                                                 | 252.27                   | C <sub>15</sub> H <sub>12</sub> N <sub>2</sub> O <sub>2</sub>                | 1.37                 | -         | CBZ metabolite       |
| 10,11-dihydro-10-hydroxy carbamazepine (10-OH-CBZ)                                   | 254.28                   | C <sub>15</sub> H <sub>12</sub> N <sub>2</sub> O <sub>2</sub>                | 1.69                 | -         | CBZ metabolite       |
| 2-hydroxy carbamazepine (2-OH-CBZ)                                                   | 252.27                   | C <sub>15</sub> H <sub>12</sub> N <sub>2</sub> O <sub>2</sub>                | 1.87                 | 10.3      | CBZ metabolite       |
| 3-hydroxy carbamazepine (3-OH-CBZ)                                                   | 252.27                   | C <sub>15</sub> H <sub>12</sub> N <sub>2</sub> O <sub>2</sub>                | 2.22                 | 10.0      | CBZ metabolite       |
| 10,11-dihydro-10,11- <i>cis</i> -dihydroxycarbamazepine ( <i>cis</i> -DiOH-CBZ)      | 270.28                   | C <sub>15</sub> H <sub>14</sub> N <sub>2</sub> O <sub>3</sub>                | -                    | -         | CBZ metabolite       |
| Oxcarbazepine                                                                        | 252.27                   | C <sub>15</sub> H <sub>12</sub> N <sub>2</sub> O <sub>2</sub>                | 2.00                 | -         | CBZ metabolite       |
| 10,11-dihydro-10,11- <i>trans</i> -dihydroxy-carbamazepine ( <i>trans</i> -DiOH-CBZ) | 270.28                   | C <sub>15</sub> H <sub>14</sub> N <sub>2</sub> O <sub>3</sub>                | 0.71                 | -         | CBZ metabolite       |

\*predicted from ACD/Percepta, 2015

**Table S4:** Matrix-effects (ME)<sup>#</sup>, absolute recovery (RA) and relative standard deviations (RSD, n=3) of solid-liquid extraction (SLE) and QuEChERS method for the extraction of 28 polar pollutants from plant material

| Analyte                  | SLE        |                   |                    | QuEChERS  |                   |                    |
|--------------------------|------------|-------------------|--------------------|-----------|-------------------|--------------------|
|                          | ME [%]     | RA [%]<br>50 ng/g | RSD [%]<br>50 ng/g | ME [%]    | RA [%]<br>50 ng/g | RSD [%]<br>50 ng/g |
| Acesulfame               | -70 / -46  | 77.9 / 66.1       | 6.5 / 5.6          | 74 / 72   | 12.6 / 18.1       | 59.8 / 27.5        |
| 4-/5-Methylbenzotriazole | -62 / -33  | 73.0 / 65.2       | 2.2 / 11.5         | 59 / 66   | 54.9 / 52.0       | 17.3 / 6.0         |
| Benzotriazole            | -55 / -15  | 70.4 / 58.2       | 4.7 / 10.1         | 58 / 45   | 44.2 / 41.0       | 17.9 / 10.8        |
| Ciprofloxacin            | -153 / -36 | 98.4 / 91.5       | 6.2 / 2.5          | -63 / -86 | 2.2 / 1.0         | 86.3 / 35.3        |
| Caffeine                 | -49 / -5   | 65.9 / 53.0       | 4.8 / 16.8         | -53 / -49 | 21.6 / 19.2       | 17.8 / 7.8         |
| Diclofenac               | -32 / -21  | 65.2 / 56.5       | 6.1 / 4.0          | 57 / 75   | 1.5 / 1.1         | 23.9 / 5.7         |
| Gabapentin               | -74 / -44  | 72.3 / 65.3       | 4.5 / 17.8         | -79 / -79 | 3.8 / 3.2         | 44.8 / 54.6        |
| Gemfibrozil              | -46 / -23  | 69.4 / 56.2       | 4.3 / 3.6          | 35 / 58   | 7.2 / 4.7         | 22.2 / 25.3        |
| Hydrochlorothiazide      | -46 / -21  | 69.6 / 57.8       | 6.6 / 16.9         | 51 / 53   | 57.1 / 50.9       | 20.3 / 7.3         |
| Iohexol                  | 30 / -6    | 27.1 / 49.7       | 6.5 / 16.1         | -79 / -78 | - / -             | - / -              |
| Lomeprol                 | 26 / -7    | 28.6 / 45.4       | 2.6 / 2.3          | -74 / -73 | - / -             | - / -              |
| Iopamidol                | 30 / 54    | 27.5 / 17.4       | 17.8 / 13.1        | -84 / -83 | - / -             | - / -              |
| Iopromide                | -49 / -11  | 65.1 / 47.5       | 2.5 / 7.0          | -64 / -66 | <MQL / -          | - / -              |
| Lamotrigine              | -52 / -29  | 65.6 / 50.7       | 2.6 / 5.8          | -62 / -63 | 12.4 / 8.4        | 16.3 / 9.6         |
| Mefenamic acid           | -59 / -10  | 68.1 / 39.2       | 3.2 / 4.9          | 42 / 41   | 1.1 / 0.6         | 49.0 / 42.4        |
| Metalaxyl                | -50 / -49  | 65.7 / 61.2       | 2.8 / 1.8          | 49 / 76   | 74.8 / 62.1       | 16.1 / 2.3         |
| Sulfamethoxazole         | -60 / -14  | 62.8 / 50.8       | 2.0 / 4.2          | 64 / 57   | 15.9 / 10.3       | 21.7 / 2.1         |
| Carbamazepine (CBZ)      | -51 / -38  | 67.9 / 65.1       | 3.4 / 16.5         | 51 / 63   | 71.7 / 59.7       | 14.8 / 2.1         |
| Acridine                 | 67 / 73    | 63.9 / 54.2       | 10.0 / 5.0         | -67 / -66 | 90.8 / 49.0       | 11.5 / 16.0        |
| Acridone                 | -54 / -39  | 70.0 / 61.4       | 3.6 / 3.3          | 57 / 68   | 78.7 / 62.5       | 13.4 / 4.4         |
| EP-CBZ                   | -41 / -26  | 62.4 / 62.9       | 4.1 / 17.4         | 44 / 54   | 65.7 / 54.6       | 14.6 / 3.3         |
| 10-OH-CBZ                | -45 / -28  | 63.1 / 61.7       | 3.0 / 16.3         | 41 / 54   | 58.5 / 48.6       | 13.9 / 1.3         |
| 2-OH-CBZ                 | -49 / -25  | 67.0 / 62.5       | 2.1 / 14.8         | 50 / 59   | 59.3 / 50.4       | 12.4 / 4.5         |
| 3-OH-CBZ                 | -57 / -41  | 71.4 / 61.6       | 3.6 / 3.2          | 54 / 71   | 48.7 / 41.4       | 13.5 / 17.7        |
| cis-DiOH-CBZ             | -32 / -10  | 62.6 / 52.3       | 6.6 / 10.9         | 29 / 34   | 47.1 / 40.1       | 13.6 / 8.2         |
| Oxcarbazepine            | -7 / 24    | 52.8 / 35.5       | 1.2 / 3.2          | 3 / 10    | 54.6 / 16.4       | 15.9 / 5.2         |
| trans-DiOH-CBZ           | -52 / -38  | 67.5 / 65.6       | 5.1 / 17.4         | 41 / 55   | 41.2 / 35.4       | 14.8 / 15.3        |

<sup>#</sup>Signal suppression (+) and enhancement (-)

**Table S5:** Method validation parameters for solid-liquid extraction of 28 environmental contaminants from freeze-dried tomato fruits: method detection limit (MDL), method quantitation limit (MQL), matrix-effects (ME)<sup>#</sup>, absolute recoveries (RA) and relative standard deviations (RSD, n = 3) at three different spiking concentrations.

| Analyte                 | MDL<br>[ng/g<br>d.w.] | MQL<br>[ng/g<br>d.w.] | ME [%] | Absolute recovery     |                        |                        | Intra-day                 |                            |                            | Inter-day                 |                            |                            |
|-------------------------|-----------------------|-----------------------|--------|-----------------------|------------------------|------------------------|---------------------------|----------------------------|----------------------------|---------------------------|----------------------------|----------------------------|
|                         |                       |                       |        | [%]<br>5 ng/g<br>d.w. | [%]<br>25 ng/g<br>d.w. | [%]<br>50 ng/g<br>d.w. | RSD [%]<br>5 ng/g<br>d.w. | RSD [%]<br>25 ng/g<br>d.w. | RSD [%]<br>50 ng/g<br>d.w. | RSD [%]<br>5 ng/g<br>d.w. | RSD [%]<br>25 ng/g<br>d.w. | RSD [%]<br>50 ng/g<br>d.w. |
| 4,5-Methylbenzotriazole | 0.2                   | 1.0                   | 1      | 80.4                  | 70.3                   | 73.2                   | 3.0                       | 3.0                        | 3.5                        | 2.0                       | 2.6                        | 3.9                        |
| Acesulfame              | 1.0                   | 2.0                   | 6      | 78.5                  | 75.5                   | 79.0                   | 13.6                      | 3.4                        | 1.2                        | 2.1                       | 3.3                        | 0.3                        |
| Benzotriazole           | 1.0                   | 2.0                   | 28     | 43.0                  | 51.4                   | 55.2                   | 20.9                      | 6.5                        | 4.6                        | 8.3                       | 7.0                        | 4.3                        |
| Caffeine                | 1.0                   | 2.0                   | 14     | 100.3                 | 63.7                   | 68.7                   | 9.2                       | 6.3                        | 11.5                       | 4.4                       | 4.8                        | 2.2                        |
| Ciprofloxacin           | 1.0                   | 2.0                   | 9      | 40.5                  | 34.6                   | 46.2                   | 8.9                       | 3.3                        | 13.7                       | 16.4                      | 12.0                       | 10.8                       |
| Diclofenac              | 1.0                   | 2.0                   | 31     | 71.7                  | 63.4                   | 71.9                   | 14.9                      | 5.5                        | 2.5                        | 11.1                      | 3.2                        | 0.8                        |
| Gabapentin              | 1.0                   | 2.0                   | 0      | 48.8                  | 48.7                   | 76.5                   | 0.9                       | 1.6                        | 4.9                        | 3.9                       | 3.3                        | 5.6                        |
| Gemfibrozil             | 0.2                   | 1.0                   | 20     | 66.3                  | 61.4                   | 66.5                   | 8.0                       | 1.2                        | 1.8                        | 6.4                       | 2.2                        | 2.5                        |
| Hydrochlorothiazide     | <0.2                  | 0.2                   | 39     | 53.6                  | 50.1                   | 54.9                   | 5.7                       | 0.9                        | 3.7                        | 2.2                       | 0.9                        | 3.2                        |
| Iohexol                 | 2.0                   | 10.0                  | 60     | <MQL                  | 24.9                   | 32.9                   | -                         | 14.1                       | 3.3                        | -                         | 10.1                       | 4.5                        |
| Iopemeron               | 2.0                   | 10.0                  | 56     | <MQL                  | 26.7                   | 39.5                   | -                         | 3.9                        | 2.8                        | -                         | 10.3                       | 3.4                        |
| Iopamidol               | 2.0                   | 10.0                  | 74     | <MQL                  | 19.8                   | 20.4                   | -                         | 1.4                        | 16.8                       | -                         | 10.9                       | 19.8                       |
| Iopromide               | 2.0                   | 10.0                  | 50     | <MQL                  | 40.4                   | 44.7                   | -                         | 7.0                        | 2.8                        | -                         | 4.1                        | 7.7                        |
| Lamotrigine             | 0.2                   | 1.0                   | -4     | 74.0                  | 71.1                   | 79.5                   | 8.0                       | 3.2                        | 3.5                        | 4.9                       | 5.8                        | 1.4                        |
| Mefenamic acid          | 1.0                   | 2.0                   | 19     | 64.8                  | 53.3                   | 60.1                   | 9.6                       | 2.2                        | 0.9                        | 1.9                       | 2.8                        | 2.0                        |
| Metalaxyl               | 1.0                   | 2.0                   | 7      | 96.5                  | 93.5                   | 97.9                   | 3.1                       | 4.5                        | 4.5                        | 8.5                       | 1.6                        | 0.9                        |
| Sulfamethoxazole        | 0.2                   | 1.0                   | 23     | 51.9                  | 51.8                   | 49.8                   | 10.3                      | 5.2                        | 13.2                       | 16.7                      | 7.9                        | 11.5                       |
| Carbamazepine (CBZ)     | 0.2                   | 1.0                   | 5      | 88.6                  | 87.2                   | 91.0                   | 0.7                       | 2.9                        | 0.0                        | 1.6                       | 2.3                        | 1.3                        |
| Acridine                | 0.2                   | 1.0                   | -10    | 82.5                  | 78.3                   | 86.6                   | 3.0                       | 1.2                        | 2.0                        | 7.6                       | 1.3                        | 4.2                        |
| Acridone                | <0.2                  | <0.2                  | 0      | 91.9                  | 89.4                   | 96.1                   | 2.1                       | 2.2                        | 0.7                        | 2.2                       | 0.9                        | 2.0                        |
| EP-CBZ                  | 0.2                   | 1.0                   | 13     | 76.2                  | 77.0                   | 79.7                   | 1.9                       | 4.3                        | 0.7                        | 2.1                       | 3.1                        | 0.7                        |
| 10-OH-CBZ               | 0.2                   | 1.0                   | 6      | 86.8                  | 86.2                   | 89.4                   | 4.0                       | 3.8                        | 2.9                        | 3.1                       | 2.1                        | 2.4                        |
| 2-OH-CBZ                | 0.2                   | 1.0                   | 6      | 82.5                  | 79.1                   | 82.7                   | 2.7                       | 0.9                        | 2.6                        | 4.3                       | 1.9                        | 1.6                        |
| 3-OH-CBZ                | <0.2                  | 0.2                   | 3      | 89.8                  | 88.0                   | 93.1                   | 2.3                       | 0.8                        | 1.1                        | 1.3                       | 0.8                        | 0.6                        |
| cis-DiOH-CBZ            | 0.2                   | 1.0                   | 31     | 52.5                  | 53.4                   | 57.4                   | 2.0                       | 4.7                        | 2.0                        | 3.9                       | 3.1                        | 3.6                        |
| Oxcarbazepine           | 0.2                   | 1.0                   | 4      | 81.4                  | 88.9                   | 92.8                   | 1.3                       | 2.5                        | 0.8                        | 5.1                       | 1.1                        | 1.9                        |
| trans-DiOH-CBZ          | 0.2                   | 1.0                   | 11     | 72.4                  | 71.5                   | 75.2                   | 4.6                       | 4.3                        | 1.2                        | 6.3                       | 5.3                        | 2.0                        |

<sup>#</sup>Signal suppression (+) and enhancement (-)

**Table S6:** Method validation parameters for solid-liquid extraction of 28 environmental contaminants from freeze-dried tomato leaves: method detection limit (MDL), method quantitation limit (MQL), matrix-effects (ME)<sup>#</sup>, absolute recoveries (RA) and relative standard deviations (RSD, n = 3) at three different spiking concentrations.

| Analyte                 | MDL<br>[ng/g<br>d.w.] | MQL<br>[ng/g<br>d.w.] | ME [%] | Absolute Recovery     |                        |                        | Intra-day                 |                            |                            | Inter-day                 |                            |                            |
|-------------------------|-----------------------|-----------------------|--------|-----------------------|------------------------|------------------------|---------------------------|----------------------------|----------------------------|---------------------------|----------------------------|----------------------------|
|                         |                       |                       |        | [%]<br>5 ng/g<br>d.w. | [%]<br>25 ng/g<br>d.w. | [%]<br>50 ng/g<br>d.w. | RSD [%]<br>5 ng/g<br>d.w. | RSD [%]<br>25 ng/g<br>d.w. | RSD [%]<br>50 ng/g<br>d.w. | RSD [%]<br>5 ng/g<br>d.w. | RSD [%]<br>25 ng/g<br>d.w. | RSD [%]<br>50 ng/g<br>d.w. |
| 4,5-Methylbenzotriazole | 0.2                   | 2.0                   | 5      | 72.6                  | 66.6                   | 66.9                   | 4.1                       | 5.2                        | 7.1                        | 3.5                       | 0.6                        | 2.1                        |
| Acesulfame              | 1.0                   | 2.0                   | 26     | 69.6                  | 64.8                   | 68.0                   | 16.8                      | 3.0                        | 9.5                        | 2.7                       | 1.5                        | 0.3                        |
| Benzotriazole           | 1.0                   | 20.0                  | 37     | 44.5                  | 46.8                   | 48.9                   | 12.1                      | 9.5                        | 10.6                       | 7.3                       | 1.5                        | 4.0                        |
| Caffeine                | 0.2                   | 1.0                   | 19     | 118.5                 | 67.0                   | 59.7                   | 10.9                      | 2.8                        | 5.2                        | 6.4                       | 2.0                        | 2.8                        |
| Ciprofloxacin           | 2.0                   | 10.0                  | -6     | <MQL                  | 24.4                   | 60.9                   | -                         | 7.4                        | 7.1                        | -                         | 9.5                        | 14.6                       |
| Diclofenac              | 1.0                   | 2.0                   | 35     | 68.3                  | 48.6                   | 53.8                   | 20.6                      | 3.9                        | 7.9                        | 29.9                      | 5.8                        | 8.6                        |
| Gabapentin              | 1.0                   | 1.0                   | 3      | 79.1                  | 52.5                   | 73.1                   | 9.3                       | 10.7                       | 14.3                       | 5.6                       | 3.4                        | 4.5                        |
| Gemfibrozil             | 0.2                   | 1.0                   | 40     | 51.6                  | 39.8                   | 43.5                   | 10.7                      | 2.3                        | 1.5                        | 6.0                       | 1.1                        | 1.7                        |
| Hydrochlorothiazide     | 0.2                   | 1.0                   | 55     | 42.9                  | 39.3                   | 41.6                   | 5.9                       | 4.3                        | 11.3                       | 6.6                       | 0.8                        | 1.2                        |
| Iohexol                 | 2.0                   | 2.0                   | 42     | <MQL                  | 27.6                   | 49.5                   | -                         | 12.8                       | 6.7                        | -                         | 11.7                       | 4.5                        |
| Ioperol                 | 2.0                   | 10.0                  | 60     | <MQL                  | 25.8                   | 38.8                   | -                         | 1.8                        | 6.2                        | -                         | 5.0                        | 0.9                        |
| Iopamidol               | 2.0                   | 10.0                  | 78     | <MQL                  | 19.3                   | 21.9                   | -                         | 7.0                        | 11.7                       | -                         | 5.6                        | 4.7                        |
| Iopromide               | 2.0                   | 10.0                  | 63     | <MQL                  | 32.3                   | 38.4                   | -                         | 9.0                        | 9.4                        | -                         | 7.4                        | 3.9                        |
| Lamotrigine             | 0.2                   | 10.0                  | 18     | 51.3                  | 58.3                   | 63.9                   | 4.2                       | 2.3                        | 14.6                       | 17.4                      | 3.9                        | 0.6                        |
| Mefenamic acid          | 1.0                   | 2.0                   | 56     | 33.2                  | 28.9                   | 32.8                   | 2.8                       | 2.0                        | 6.4                        | 7.4                       | 2.4                        | 2.0                        |
| Metalaxyl               | 1.0                   | 1.0                   | 4      | 91.2                  | 94.5                   | 98.9                   | 4.3                       | 3.7                        | 2.5                        | 2.5                       | 3.1                        | 2.0                        |
| Sulfamethoxazole        | 1.0                   | 2.0                   | 45     | 28.6                  | 29.4                   | 29.1                   | 9.0                       | 12.2                       | 19.4                       | 16.8                      | 7.9                        | 12.5                       |
| Carbamazepine (CBZ)     | 0.2                   | 1.0                   | 62     | 35.2                  | 31.9                   | 33.3                   | 3.5                       | 2.8                        | 2.1                        | 3.8                       | 0.5                        | 1.9                        |
| Acridine                | 0.2                   | 2.0                   | -17    | 97.2                  | 95.4                   | 95.3                   | 3.8                       | 6.8                        | 10.9                       | 4.7                       | 3.1                        | 2.2                        |
| Acridone                | <0.2                  | 1.0                   | 4      | 87.1                  | 85.3                   | 87.7                   | 2.2                       | 5.3                        | 3.9                        | 2.4                       | 1.2                        | 1.3                        |
| EP-CBZ                  | 0.2                   | 1.0                   | 11     | 81.0                  | 75.2                   | 79.0                   | 4.7                       | 5.0                        | 5.5                        | 1.6                       | 2.7                        | 2.2                        |
| 10-OH-CBZ               | 0.2                   | 0.2                   | 12     | 86.5                  | 80.2                   | 83.6                   | 2.8                       | 4.7                        | 5.5                        | 2.8                       | 2.0                        | 2.7                        |
| 2-OH-CBZ                | 0.2                   | 1.0                   | 13     | 76.3                  | 79.8                   | 81.6                   | 5.1                       | 4.0                        | 2.7                        | 6.5                       | 3.9                        | 2.3                        |
| 3-OH-CBZ                | <0.2                  | 1.0                   | 11     | 81.0                  | 80.8                   | 85.2                   | 3.3                       | 4.1                        | 5.5                        | 2.1                       | 0.5                        | 1.4                        |
| cis-DiOH-CBZ            | 1.0                   | 1.0                   | 38     | 55.3                  | 47.5                   | 49.3                   | 1.9                       | 11.4                       | 5.1                        | 11.3                      | 4.8                        | 3.2                        |
| Oxcarbazepine           | 0.2                   | <0.2                  | 13     | 56.2                  | 58.9                   | 61.6                   | 3.0                       | 8.2                        | 14.0                       | 7.5                       | 7.0                        | 14.1                       |
| trans-DiOH-CBZ          | 0.2                   | 1.0                   | 32     | 64.5                  | 64.4                   | 66.9                   | 10.0                      | 1.7                        | 7.0                        | 5.8                       | 2.5                        | 1.1                        |

<sup>#</sup>Signal suppression (+) and enhancement (-)
